# Supplementary material for: Synthesis and Antibacterial Evaluation of New Pyrazolo[3,4-d]pyrimidines Kinase Inhibitors
Source: MDPI journal article supplement (doi:10.3390/molecules25225354), 2020-11-16
Supplement: s1 [file s1]

|                                                |           |      |            |            |            |
|------------------------------------------------|-----------|------|------------|------------|------------|
| StAu_newman_A6QGC0.1                           | VD        | EED  | DC         | YYLMVEYIEG | PTLSEYIESH |
| Stau_aureus_CAA73980.1                         |           |      |            |            |            |
| Ecoli_MQS28384                                 |           |      |            |            |            |
| PsAe_MUK59325.1                                |           |      |            |            |            |
| Stau_SCT90678.1                                | VD        | EED  | DC         | YYLMVEYIEG | PTLSEYIQSH |
| Stpn_Bacilli_multispecies_WP_048762376.1       | VE        | EDD  | DN         | FYLIMEYIDG | PTLSEYIHS  |
| PsAe_WP_150019979.1                            |           |      |            |            |            |
| PsAe_WP_121410777.1                            |           |      |            |            |            |
| Enfu_VFA68308.1                                | IG        | EED  | GQ         | QFLVMEYVDG | FDLKKYIQDN |
| Stpn_WP_160544498.1                            | IG        | EED  | GQ         | QFLAMEYVNG | PDLKKYIQDH |
| Stpn_Streptococcus_multispecies_WP_049527645.1 | IG        | EED  | GQ         | QFLVMEYVDG | SDLKKYIQDH |
| PsAe_RUC36476.1                                |           |      |            |            |            |
| Enfu_WP_016624302.1                            | VG        | EES  | GM         | QYLMVEYVKG | MDLKRYIOTH |
| Limo_WP_003733096.1                            | VG        | EEN  | DL         | HYIVMEHVDG | MDLKQYIHEN |
| Listeria_multispecies_WP_003767439.1           | VG        | EEN  | DL         | HYIVMEHVDG | MDLKQYIQEN |
| Stpn_CJR66226.1                                | LG        | EED  | DI         | YYIVMEYVEG | MTLKEYITAN |
| Stpn_COC44426.1                                | IG        | EEG  | DI         | YYIVMEYVEG | MTLKEYITAH |
| Stpn_CVM85423.1                                | VG        | EED  | DI         | YYIVMEYVEG | MTLKEYIHAN |
| Stpn_CVM86034.1                                | TG        | EVSL | ED-GLHPVDC | PFLVMELVSG | RTLREILHAE |
| Chtr_CQB85900.1                                | SG        | EESV | EDDNGVEEHL | PYLMVEYVKG | KTLRDILKMN |
| Chtr_CRH87370.1                                | TG        | EETI | VSDSGRTLAL | PYIVMEYVKG | RTVSTLLKHG |
| Chtr_CRH89418.1                                | TG        | EEML | TGPEGRAISV | PYIVMEYVEG | HTVKELLADG |
| PsAe_WP_121124925.1                            |           |      |            |            |            |
| Errh_WP_016357241.1                            | VG        | EDE  | GQ         | HYIVMEMIRG | TTLKQLVHRR |
| Errh_WP_173446533.1                            | VG        | ESD  | GM         | HYIVMEFIRG | RTLKQLIQOR |
| Chtr_CRH67572.1                                |           |      |            |            |            |
| Chtr_CRH88717.1                                | QGIYHSSEG |      | ER         | AYLMELING  | PDLRSELSAH |
| PsAe_SQG56831.1                                | TG        | ETER | AG         | IST        | PYIVMERVHG |
| Codi_WP_003849886.1                            | TG        | ETPR | AG         | LNT        | PYIVMELVNG |
| Chtr_CRH62988.1                                | WG        | KDN  |            | DT         | YFIAMEYLRG |
| PsAe_SQG59153.1                                | FS        | SDG  |            | DQ         | IFLIMELITG |
| Codi_WP_003852190.1                            | FS        | SDG  |            | DN         | IFLIMELITG |
| Chtr_CRH93390.1                                |           |      |            |            |            |
| Chtr_CPS17231.1                                |           |      |            |            |            |
| Chtr_COB89058.1                                |           |      |            |            |            |

|                                                |             |            |            |            |
|------------------------------------------------|-------------|------------|------------|------------|
| StAu_newman_A6QGC0.1                           | GPLSVDTAIN  | FTNQILDGIK | HAHDMRIVHR | DIKPQNILID |
| Stau_aureus_CAA73980.1                         |             |            |            |            |
| Ecoli_MQS28384                                 |             |            |            |            |
| PsAe_MUK59325.1                                |             |            |            |            |
| Stau_SCT90678.1                                | GPLSVDTAIN  | FTNQILDGIK | HAHDMRIVHR | DIKPQNILID |
| Stpn_Bacilli_multispecies_WP_048762376.1       | GPLNIETAID  | FIKQILNGVK | QAHEQRIIHR | DIKPQNVLIN |
| PsAe_WP_150019979.1                            |             |            |            |            |
| PsAe_WP_121410777.1                            |             |            |            |            |
| Enfu_VFA68308.1                                | APLSNNNEVVR | IMNEVLSAMS | LAHQKGIVHR | DLKPQNILLT |
| Stpn_WP_160544498.1                            | APLSNTETVR  | IMSEVLSAMQ | LAHQKGIVHR | DLKPQNVLLT |
| Stpn_Streptococcus_multispecies_WP_049527645.1 | APLSNQDVVR  | IMGEILSAMT | LAHQKGIIHR | DLKPQNVLLT |
| PsAe_RUC36476.1                                |             |            |            |            |
| Enfu_WP_016624302.1                            | YPIPYQTVVD  | IMQQILSAIS | LAHAHRIIHR | DLKPQNILID |
| Limo_WP_003733096.1                            | HPISYEKAVD  | IMLQIVSAVA | IAHQHHIIHR | DLKPQNILID |
| Listeria_multispecies_WP_003767439.1           | HPISYEKAVD  | IMLQIVSAVA | IAHQHHIIHR | DLKPQNILID |
| Stpn_CJR66226.1                                | GPLHPKEALN  | IMEQIVSAIA | HAHQNQIVHR | DIKPQNILID |
| Stpn_COC44426.1                                | GPLHPKEALS  | VMEQIVSAIA | HAHQNHIVHR | DIKPHNILID |
| Stpn_CVM85423.1                                | GPLHPKEAVR  | IMEQVVAAME | EAHAKQLVHR | DIKPHNILID |
| Stpn_CVM86034.1                                | GAVGTDRAVA  | WTRGVLEALE | HAHEEGIVHR | DVKPANVMVT |
| Chtr_CQB85900.1                                | GALSORDSEO  | VMLGVNLALE | YSHRMGVIHR | DIKPGNIMIS |
| Chtr_CRH87370.1                                | QALPINEAVQ  | IAGVGLSALE | YSHYEGIIHR | DIKPGNIMIS |
| Chtr_CRH89418.1                                | TPVPINEAVA  | IVSGVLEALE | YSHSQHLVHR | DIKPGNIMLT |
| PsAe_WP_121124925.1                            |             |            |            |            |
| Errh_WP_016357241.1                            | GALDKYESVA  | IMOOLASALO | HAHAHVIIHR | DIKPQNILVK |
| Errh_WP_173446533.1                            | GALSVSESIQ  | IMTQLTSAID | HAHKHNIHR  | DIKPQNVLVK |
| Chtr_CRH67572.1                                |             |            |            |            |
| Chtr_CRH88717.1                                | GSFTLRDSLE  | ITROVLTALE | VAHEAGIVHR | DVKPENILLS |
| PsAe_SQG56831.1                                | GPLSPTEAAQ  | TLIPVCOALQ | FSHDAGIIHR | DIKPANVMIT |
| Codi_WP_003849886.1                            | GPLTPSOAAH  | TLIPVCHALQ | VSHDAGIIHR | DIKPANVMIT |
| Chtr_CRH62988.1                                | GALDCKKVAQ  | IGSQIAQALS | VAHRHDIHR  | DIKPQNIMVO |
| PsAe_SQG59153.1                                | GPMPPHAAAA  | VMHSVLTGLS | VAHNAGMVHR | DIKPDNVLIN |
| Codi_WP_003852190.1                            | GPMPPHAAVA  | VMRSVLTGLS | VAHSAGMVHR | DIKPDNVLIN |
| Chtr_CRH93390.1                                |             |            |            |            |
| Chtr_CPS17231.1                                |             |            |            |            |
| Chtr_CQB89058.1                                |             |            |            | LIH        |

161

|                                                |            |       |            |            |         |            |
|------------------------------------------------|------------|-------|------------|------------|---------|------------|
| StAu_newman_A6QGC0.1                           | S          | ----- | NKTLKIFD   | FGIAKAL    | --S     | ETSLTQTNHV |
| Stau_aureus_CAA73980.1                         |            | ----- |            |            |         |            |
| Ecoli_MQS28384                                 |            | ----- |            |            |         |            |
| PsAe_MUK59325.1                                |            | ----- |            |            |         |            |
| Stau_SCT90678.1                                | S          | ----- | NKTLKIFD   | FGIAKAL    | --S     | ETSLTQTNHV |
| Stpn_Bacilli_multispecies_WP_048762376.1       | K          | ----- | DKILKIFD   | FGIAKAL    | --S     | ETSMTQTNHV |
| PsAe_WP_150019979.1                            |            | ----- |            | D          | FGSVVAA | P YVQM     |
| PsAe_WP_121410777.1                            |            | ----- |            |            |         | TNTL       |
| Enfu_VFA68308.1                                | K          | ----- | KGTVKVTD   | FGIAVAF    | --A     | ETSLTQTNSM |
| Stpn_WP_160544498.1                            | K          | ----- | DGVAKVTD   | FGIAVAF    | --A     | ETSLTQTNSM |
| Stpn_Streptococcus_multispecies_WP_049527645.1 | K          | ----- | DGRAKVTD   | FGIAVAF    | --A     | ETSLTQTNSM |
| PsAe_RUC36476.1                                |            | ----- |            |            |         |            |
| Enfu_WP_016624302.1                            | Q          | ----- | EGVVKITD   | FGIAIAL    | --S     | ETSITQTNSM |
| Limo_WP_003733096.1                            | H          | ----- | DGVVKITD   | FGIAMAL    | --S     | ETSITQTNSL |
| Listeria_multispecies_WP_003767439.1           | H          | ----- | DGVVKITD   | FGIAMAL    | --S     | ETSITQTNSL |
| Stpn_CJR66226.1                                | H          | ----- | MGNIKVTD   | FGIATAL    | --S     | STTITHTNSV |
| Stpn_COC44426.1                                | H          | ----- | LGHIKVTD   | FGIATAL    | --T     | STTITHTNSV |
| Stpn_CVM85423.1                                | N          | ----- | LGNIKVTD   | FGIAMAL    | --S     | SATITHTNSV |
| Stpn_CVM86034.1                                | E          | ----- | TGAVKVMD   | FGIAHALADT |         | SATTSQTQAV |
| Chtr_CQB85900.1                                | E          | ----- | QGIVKVMD   | FGIARALDDS |         | ATTMTQSQGV |
| Chtr_CRH87370.1                                | Q          | ----- | DGKVKVMD   | FGIARAIADS |         | SATMTSTNSV |
| Chtr_CRH89418.1                                | N          | ----- | DGKVKVMD   | FGIARAITDS |         | QATMTQTNAV |
| PsAe_WP_121124925.1                            |            | ----- |            |            |         |            |
| Errh_WP_016357241.1                            | D          | ----- | DGTVKITD   | FGIALAG    | --D     | AIQLTKSDSV |
| Errh_WP_173446533.1                            | D          | ----- | DGTVKITD   | FGIAIAN    | --D     | AVQLTLNNAV |
| Chtr_CRH67572.1                                |            | ----- |            |            |         |            |
| Chtr_CRH88717.1                                | ESISHKHVLS |       | PPSYTAKVAD | FGLARAV    | --S     | DVTSTHSGOM |
| PsAe_SQG56831.1                                | N          | ----- | TGTVKIMD   | FGIARALDDA |         | TSAMTQTSVA |
| Codi_WP_003849886.1                            | N          | ----- | TGAVKIMD   | FGIARALDDA |         | TSAMTQTSVA |
| Chtr_CRH62988.1                                | P          | ----- | DGNIKVMD   | FGIARA     | --K     | NSHLTTDNSV |
| PsAe_SQG59153.1                                | S          | ----- | DHQVKLAD   | FGLVRAA    | --S     | ASQAT SANI |
| Codi_WP_003852190.1                            | A          | ----- | DHQVKLAD   | FGLVRAA    | --S     | ASQAT SNQI |
| Chtr_CRH93390.1                                |            | ----- |            |            |         |            |
| Chtr_CPS17231.1                                |            | ----- |            |            |         |            |
| Chtr_CQB89058.1                                |            | ----- |            |            |         |            |

201

|                                                |            |            |            |             |
|------------------------------------------------|------------|------------|------------|-------------|
| StAu_newman_A6QGC0.1                           | IGTVQYFSPE | QAKGEATDEC | TDIYSIGIVL | YEMLVGEPPE  |
| Stau_aureus_CAA73980.1                         |            |            |            |             |
| Ecoli_MQS28384                                 |            |            |            |             |
| PsAe_MUK59325.1                                |            |            |            |             |
| Stau_SCT90678.1                                | IGTVQYFSPE | QAKGEATDEC | TDIYSIGIVL | YEMLVGEPPE  |
| Stpn_Bacilli_multispecies_WP_048762376.1       | IGTVQYLSPE | QAKGDKTNET | TDIYSIGIVL | YEMLVGEPPE  |
| PsAe_WP_150019979.1                            |            |            |            | ILKDTLPY    |
| PsAe_WP_121410777.1                            | PE         | PKPG       |            |             |
| Enfu_VFA68308.1                                | IGSVHYLSPE | QARGSKATVQ | SDIYAMGIML | FEMLTGHIPIY |
| Stpn_WP_160544498.1                            | IGSVHYLSPE | QARGSKATIQ | SDIYAMGIML | FEMLTCHIPF  |
| Stpn_Streptococcus_multispecies_WP_049527645.1 | IGSVHYLSPE | QARGSKATIQ | SDIYAMGIML | FEMLTGRIPY  |
| PsAe_RUC36476.1                                |            |            |            |             |
| Enfu_WP_016624302.1                            | IGSVHYLSPE | QARGSMATKQ | SDIYALGIVL | YEMLTGSPVF  |
| Limo_WP_003733096.1                            | IGSVHYLSPE | QARGGMATQK | SDIYSLGIVL | YELLTGKVPF  |
| Listeria_multispecies_WP_003767439.1           | IGSVHYLSPE | QARGGMATQK | SDIYSLGIVL | YELLTGKVPF  |
| Stpn_CJR66226.1                                | IGSVHYLSPE | QARGGLATKK | SDIYALGIVL | FELLTGRIPF  |
| Stpn_COC44426.1                                | IGSVHYLSPE | QARGGLATKK | SDIYALGIVL | FELLTGRIPF  |
| Stpn_CVM85423.1                                | IGSVHYLSPE | QARGGLATKK | SDIYSLGIVL | YELISGRMPF  |
| Stpn_CVM86034.1                                | VGTAQYLSPE | QATGRTVDGR | ADLYAAGCLL | FELLTGRPPF  |
| Chtr_CQB85900.1                                | VGTAQYLSPE | QARGEQVDMR | SDLYSAGCVL | YEMLTGRPPF  |
| Chtr_CRH87370.1                                | VGTAQYLSPE | QARGEVVDAR | SDLYSTGCLI | YELLTGKPPF  |
| Chtr_CRH89418.1                                | VGTAQYLSPE | QARGEQVDAR | SDLYSTGVVL | FELLTGRPPF  |
| PsAe_WP_121124925.1                            |            |            |            |             |
| Errh_WP_016357241.1                            | IGSVHYMAPE | CSRGEGAGEQ | SDVYSLGVVF | YELLTGDVPY  |
| Errh_WP_173446533.1                            | MGSAHYLAPE | TAQGKEPTAQ | VDIYSLGIVF | YELLTGDVPF  |
| Chtr_CRH67572.1                                |            |            |            | MPW         |
| Chtr_CRH88717.1                                | IGTVAYTAPE | IVTRGRADOR | ADLYALGVML | YELLAGTOPF  |
| PsAe_SQG56831.1                                | IGTAQYLSPE | QARGKLADAR | SDVYALGCVL | YETLTGRPPF  |
| Codi_WP_003849886.1                            | IGTAQYLSPE | QARGKLADAR | SDVYALGCVL | YETLTGRPPF  |
| Chtr_CRH62988.1                                | IGTAHYVSPE | OTOGKPLGPT | TDIYSLGIVM | YEAATGVVPF  |
| PsAe_SQG59153.1                                | IGTVSYLSPE | QVSGDDIGPA | SDVYSAGILL | YELLTGTTPF  |
| Codi_WP_003852190.1                            | IGTVSYLSPE | QVSGDDIGPE | SDVYSAGIVM | FELLTGTTPF  |
| Chtr_CRH93390.1                                |            |            |            |             |
| Chtr_CPS17231.1                                |            |            |            |             |
| Chtr_CQB89058.1                                |            |            | IGLM       |             |

241

|                                                |            |            |            |            |
|------------------------------------------------|------------|------------|------------|------------|
| StAu_newman_A6QGC0.1                           | NGETAVSIAI | KHIQDSVPNV | T---TDVRKD | IPQSLSNVIL |
| Stau_aureus_CAA73980.1                         | -----      | -----      | -----      | -----      |
| Ecoli_MQS28384                                 | -----      | -----      | -----      | -----      |
| PsAe_MUK59325.1                                | -----      | -----      | -----      | -----      |
| Stau_SCT90678.1                                | NGETAVSIAI | KHIQDSVPNV | T---TDVRKD | IPQSLSNVIL |
| Stpn_Bacilli_multispecies_WP_048762376.1       | RGETAVSIAI | KHIQETVPNI | ----TEKHPN | IPQSLSNVVL |
| PsAe_WP_150019979.1                            | LG-----    | -----      | -----      | -----      |
| PsAe_WP_121410777.1                            | -----      | -----      | -----      | -----      |
| Enfu_VFA68308.1                                | DGDSAVTIAL | QHFQKPLPSI | ----LAENKS | VPQALENIVI |
| Stpn_WP_160544498.1                            | DGDSAVTIAL | QHFQKPLPSI | ----IFENRN | VPQALENVVI |
| Stpn_Streptococcus_multispecies_WP_049527645.1 | DGDSAVTIAL | QHFQKPLPSI | ----LAENHN | VPQALENVVI |
| PsAe_RUC36476.1                                | ----AVTIAL | KHFQEEIPSV | ----KMFDPG | IPQSLENVVR |
| Enfu_WP_016624302.1                            | DGESAVTIAL | KHFQEDLPSI | ----TTLDPN | VPQSLENIVL |
| Limo_WP_003733096.1                            | DGESAVSIAI | KHLQADIPSA | ----REQNPE | IPQSLENIII |
| Listeria_multispecies_WP_003767439.1           | DGESAVSIAI | KHLQAEIPSA | ----RAQNPE | IPQSLENIII |
| Stpn_CJR66226.1                                | DGESAVSIAL | KHLQAEIPSA | ----KRWNPS | VPQSVENIIL |
| Stpn_COC44426.1                                | DGESAVSIAL | KHLQETIPSA | ----RKWNPS | IPQSVENIIL |
| Stpn_CVM85423.1                                | EGESAVSVAL | KHLOSEPPSV | ----RRWNPS | VPOSVENIIL |
| Stpn_CVM86034.1                                | TGDTPLAVAY | QHVREEPPAP | ----SDVDPD | LPPAFDPVVL |
| Chtr_CQB85900.1                                | TGDSAVAIAY | QHVSEVATPL | ----STLVPG | LPVMWDKICA |
| Chtr_CRH87370.1                                | QGDSAVAVAY | QHVSEPPKVP | ----SLIAPD | IPDAIDRVVM |
| Chtr_CRH89418.1                                | TGDSAVAVAY | QHVQQLPPTP | ----SSITPD | VPEALDRVVM |
| PsAe_WP_121124925.1                            | -----      | ----QSTPSG | ----QTLMP- | -----      |
| Errh_WP_016357241.1                            | RGETPVEIAM | KHMRPEFPSP | ----MKFNPT | LPNSIANIIA |
| Errh_WP_173446533.1                            | HGKTPTEIAV | KHLROPIPYV | ----RDFNPA | IPQAVENIIL |
| Chtr_CRH67572.1                                | EGENAIQIAT | HHVNDPIPMF | ----STLVSW | LPREIDDFIS |
| Chtr_CRH88717.1                                | IGESPFAVAY | AHVNDPMRPL | ----TOTAEW | MPDDIDSFIC |
| PsAe_SQG56831.1                                | EGETPFAVAY | QHVQEDPAKP | SEFVSDLTPT | AAVNVDVAVL |
| Codi_WP_003849886.1                            | EGETPFAVAY | QHVQEDPVKP | SEYIADLSPT | AAINVDVAVL |
| Chtr_CRH62988.1                                | DGDDAISVAL | KOVNEQPVPP | ----SARNPR | VDOALERIIL |
| PsAe_SQG59153.1                                | SGDTQIAHAY | SRLDRTVPAP | ----SDVIDG | IPPLFDALVA |
| Codi_WP_003852190.1                            | SGDNQIAHAY | ARLDSAVPAP | ----SSMIAG | IPPLIDALVA |
| Chtr_CRH93390.1                                | -----      | -----      | -----      | MPQALENVVL |
| Chtr_CPS17231.1                                | -----      | -----      | -----      | -----      |
| Chtr_CQB89058.1                                | -----      | -----      | -----      | -----      |

281

|                                                |            |             |            |            |
|------------------------------------------------|------------|-------------|------------|------------|
| StAu_newman_A6QGC0.1                           | RATEKDKANR | YKTIQEMKDD  | LSSVL----- | -----      |
| Stau_aureus_CAA73980.1                         | -----      | -----       | -----      | -----      |
| Ecoli_MQS28384                                 | -----      | -----       | -----      | -----      |
| PsAe_MUK59325.1                                | -----      | -----       | -----      | -----      |
| Stau_SCT90678.1                                | RATEKDKANR | YKTIQEMKDD  | LSSVL----- | -----      |
| Stpn_Bacilli_multispecies_WP_048762376.1       | KATEKNPKDR | YQTIEEMYND  | LSSVL----- | -----      |
| PsAe_WP_150019979.1                            | -----      | -----       | -----      | -----      |
| PsAe_WP_121410777.1                            | -----      | -----       | -----      | -----      |
| Enfu_VFA68308.1                                | KATAKKLTDR | YKTTYEMGRD  | LSTAL----- | -----      |
| Stpn_WP_160544498.1                            | KATAKKLGDR | YVSTTDMYQD  | LGTSL----- | -----      |
| Stpn_Streptococcus_multispecies_WP_049527645.1 | RATAKKLENR | YNSTLEMSRD  | LVTSL----- | -----      |
| PsAe_RUC36476.1                                | HATAKDPDR  | YKTANEMAED  | LYTSL----- | -----      |
| Enfu_WP_016624302.1                            | RATAKEPADR | YKTADEMSDD  | LATAL----- | -----      |
| Limo_WP_003733096.1                            | KATAKDPFLR | YQNAEEMEKD  | LOTCL----- | -----      |
| Listeria_multispecies_WP_003767439.1           | KATAKDPFLR | YQNAEEMEKD  | LOTCL----- | -----      |
| Stpn_CJR66226.1                                | KATAKDPFHR | YETAEDMEAD  | IKTAF----- | -----      |
| Stpn_COC44426.1                                | KATAKDPFHR | YESAEDMEAD  | IRTAF----- | -----      |
| Stpn_CVM85423.1                                | KAMAKDPFYR | YEDASEMQKD  | LKTAF----- | -----      |
| Stpn_CVM86034.1                                | RALRKDPEDR | FPTGTAFLLA  | LEEAA----- | -----      |
| Chtr_CQB85900.1                                | KAMAKDRONR | YATAAEFKND  | ILAFM----- | -----      |
| Chtr_CRH87370.1                                | KSLAKKREDR | YQTASEMRTD  | LLAAL----- | -----      |
| Chtr_CRH89418.1                                | KALAKDRTDR | YTSAAASMLAD | LMRAS----- | -----      |
| PsAe_WP_121124925.1                            | -----      | -----       | -----      | -----      |
| Errh_WP_016357241.1                            | RATHKNRTHR | YANMKEFVED  | LDTCL----- | -----      |
| Errh_WP_173446533.1                            | KATAKDPKDR | YSSAYAMLED  | LQNCM----- | -----      |
| Chtr_CRH67572.1                                | ALAATNPDER | PTDAGEALEL  | LARVEIGLPE | EILTRRADVA |
| Chtr_CRH88717.1                                | TLTAKDPSKR | PLNASAAALD  | LTNVITHLDD | ADQMRRIPVF |
| PsAe_SQG56831.1                                | TAMAKHPGDR | YQTAMDGMAD  | LERLA----- | -----      |
| Codi_WP_003849886.1                            | TAMSKHPGDR | YQTAQEMCAD  | LERLE----- | -----      |
| Chtr_CRH62988.1                                | KCMOKDPKNR | FOTAEFVKV   | LRDYL----- | -----      |
| PsAe_SQG59153.1                                | SATTLSPHDR | FTDADEFLLA  | LDDVA----- | -----      |
| Codi_WP_003852190.1                            | SATALRPEER | FADAAEFLLA  | LDDVA----- | -----      |
| Chtr_CRH93390.1                                | KATAKKITDR | YKTVAEMYAD  | LASSL----- | -----      |
| Chtr_CPS17231.1                                | -----      | -----       | -----      | -----      |
| Chtr_CQB89058.1                                | -----      | -----       | -----      | -----      |

321

|                                                |            |             |           |            |
|------------------------------------------------|------------|-------------|-----------|------------|
| StAu_newman_A6QGC0.1                           | -----HE    | NRANEDVYEL  | DK        | -----      |
| Stau_aureus_CAA73980.1                         | -----      | -----       | -----     | -----      |
| Ecoli_MQS28384                                 | -----      | -----       | -----     | -----      |
| PsAe_MUK59325.1                                | -----      | -----       | -----     | -----      |
| Stau_SCT90678.1                                | -----HE    | NRANEDVYEL  | DK        | -----      |
| Stpn_Bacilli_multispecies_WP_048762376.1       | -----VT    | SRLNEEKHTR  | IS        | -----      |
| PsAe_WP_150019979.1                            | -----      | -----       | -----     | -----      |
| PsAe_WP_121410777.1                            | -----      | -----       | -----     | -----      |
| Enfu_VFA68308.1                                | -----SS    | TRHREP KLVF | N         | -----      |
| Stpn_WP_160544498.1                            | -----DS    | RRARESKLVF  | Q         | -----      |
| Stpn_Streptococcus_multispecies_WP_049527645.1 | -----YP    | SHSRDAKVVV  | D         | -----      |
| PsAe_RUC36476.1                                | -----SA    | SRLNEPAWEP  | TA        | -----      |
| Enfu_WP_016624302.1                            | -----SP    | GRSNEALWMP  | AA        | -----      |
| Limo_WP_003733096.1                            | -----NK    | DRLNEPKYVF  | PT        | -----      |
| Listeria_multispecies_WP_003767439.1           | -----NK    | DRLNEPKYVF  | PTN       | -----      |
| Stpn_CJR66226.1                                | -----DA    | DRLNEKRFTI  | QE        | -----      |
| Stpn_COC44426.1                                | -----DA    | GRLNEQKFSV  | QD        | -----      |
| Stpn_CVM85423.1                                | -----DP    | ARLKEKRFVI  | EE        | -----      |
| Stpn_CVM86034.1                                | -----AD    | PHAGPGRHTP  | PLDAFPALV | GAGGAVLGAA |
| Chtr_CQB85900.1                                | -----NG    | GVVVAFAFNP  | LT        | -----      |
| Chtr_CRH87370.1                                | -----RG    | DAIHAPAIGT  | WE        | -----      |
| Chtr_CRH89418.1                                | -----RG    | GHVNAFAVAV  | WA        | -----      |
| PsAe_WP_121124925.1                            | -----      | -----       | -----     | -----      |
| Errh_WP_016357241.1                            | -----LE    | SRADEPLWEA  | TMES      | -----DDGT  |
| Errh_WP_173446533.1                            | -----NW    | EMRNVERISF  | TT        | -----      |
| Chtr_CRH67572.1                                | P-----KVAS | SAGETATWE   | -----     | -----      |
| Chtr_CRH88717.1                                | PHKPII--EK | TEITSSHTSI  | SSTS      | -----      |
| PsAe_SQG56831.1                                | -----RH    | AVTEAARHYV  | SPASL     | -----      |
| Codi_WP_003849886.1                            | -----RN    | AVTDAARHYV  | TPTSF     | -----      |
| Chtr_CRH62988.1                                | -----A     | GKMNE       | -----     | -----      |
| PsAe_SQG59153.1                                | -----AE    | LQLPAFKVPV  | PANAA     | AHRASENIN  |
| Codi_WP_003852190.1                            | -----QE    | LRLPEFRVPV  | PANAA     | AYRSNEHLT  |
| Chtr_CRH93390.1                                | -----SS    | SRKNEKKVEL  | SD        | -----      |
| Chtr_CPS17231.1                                | -----      | -----       | -----     | -----      |
| Chtr_CQB89058.1                                | -----      | -----       | -----     | -----      |

361

|                                                |               |             |            |            |       |
|------------------------------------------------|---------------|-------------|------------|------------|-------|
| StAu_newman_A6QGC0.1                           | -----MKT      | IAVPLKKEDL  | AKHISEHKSN | QP         | ----- |
| Stau_aureus_CAA73980.1                         | -----         | -----       | -----      | -----      | ----- |
| Ecoli_MQS28384                                 | -----         | -----       | -----      | -----      | ----- |
| PsAe_MUK59325.1                                | -----         | -----       | -----      | -----      | ----- |
| Stau_SCT90678.1                                | -----MKT      | IAVPLKKEDL  | AKHISEHKSN | QP         | ----- |
| Stpn_Bacilli_multispecies_WP_048762376.1       | -----DTT      | QTVPIDKKEI  | KNKLDEENHK | KD         | ----- |
| PsAe_WP_150019979.1                            | -----         | VEPIFDDET   | AELN       | -----      | ----- |
| PsAe_WP_121410777.1                            | -----         | -----       | -----      | -----      | ----- |
| Enfu_VFA68308.1                                | -----DTEST    | KTLPKVTSTV  | SSLTTEQLLR | N          | ----- |
| Stpn_WP_160544498.1                            | -----DTTDT    | KTLPKIEPSP  | VKEAPKAVVA | -----      | ----- |
| Stpn_Streptococcus_multispecies_WP_049527645.1 | -----DMTDT    | KTLPKVTPVP  | SVSSEKKATA | K          | ----- |
| PsAe_RUC36476.1                                | -----LLGET    | KVLTPIPEDI  | AEPEETTPVE | -----      | ----- |
| Enfu_WP_016624302.1                            | -----MHNET    | KAIEPIDEEA  | LHQTESMHAE | -----      | ----- |
| Limo_WP_003733096.1                            | -----DDGDT    | KAIPIIATKD  | TMQNLDKTIV | -----      | ----- |
| Listeria_multispecies_WP_003767439.1           | -----DDDGD    | KTIPIIATKE  | AMQNLDKTIV | -----      | ----- |
| Stpn_CJR66226.1                                | -----DEEMT    | KAIPIIKDEE  | LAKAAGEKE  | -----      | ----- |
| Stpn_COC44426.1                                | -----DEEMT    | KAIPVITDGA  | KAASQAETP  | -----      | ----- |
| Stpn_CVM85423.1                                | -----DHEAT    | KAIPIIKDHO  | VDQDNEKTAV | -----      | ----- |
| Stpn_CVM86034.1                                | AAEHGADVPM    | AAVPLTRPTP  | SVPAEPDAAQ | PQAA       | NHA   |
| Chtr_CQB85900.1                                | -----DLANM    | RARKOAEONA  | ATQAMNNAD  | -----      | ----- |
| Chtr_CRH87370.1                                | -----TYVSP    | SPLPPSAAAT  | Q          | -----      | ----- |
| Chtr_CRH89418.1                                | -----DTVPM    | AAANVANSQP  | TQTLPPAVAS | -----      | ----- |
| PsAe_WP_121124925.1                            | -----         | -----       | -----      | -----      | ----- |
| Errh_WP_016357241.1                            | KLIEKLNGVT    | ETLP        | -----      | -----      | ----- |
| Errh_WP_173446533.1                            | -----         | PNIKVD      | V          | -----      | ----- |
| Chtr_CRH67572.1                                | -----HLGVT    | SSLPPTGHST  | S          | -----      | ----- |
| Chtr_CRH88717.1                                | -----HSAOHT   | STIPPKRTDE  | LEIVTTSEIF | PTQQ       | ----- |
| PsAe_SQG56831.1                                | -----ISQEPNPT | TIVPITQLDQ  | PGPASAA    | -----      | ----- |
| Codi_WP_003849886.1                            | -----ATQDPAST | TVVPVITQVAE | LDHAEAGAGI | GA         | ----- |
| Chtr_CRH62988.1                                | -----VNNAT    | AQMPVMATNA  | VSPLNSTTAL | PH         | ----- |
| PsAe_SQG59153.1                                | GALSATDLLT    | TDIPRDATEL  | IDDAPGHGLF | PHSQYPTTHE | ----- |
| Codi_WP_003852190.1                            | VHFTTSDLMT    | TDLPRETEGL  | -----      | -----      | ----- |
| Chtr_CRH93390.1                                | -----NKVDI    | KTLPKLSQST  | TEVKPVKAKS | -----      | ----- |
| Chtr_CPS17231.1                                | -----         | -----       | -----      | -----      | ----- |
| Chtr_CQB89058.1                                | -----         | -----       | -----      | -----      | ----- |



401

|                                                |              |             |            |            |
|------------------------------------------------|--------------|-------------|------------|------------|
| StAu_newman_A6QGC0.1                           | -----K       | RETTQVPIVN  | G          | -----      |
| Stau_aureus_CAA73980.1                         | -----        | -----       | -----      | -----      |
| Ecoli_MQS28384                                 | -----        | -----       | -----      | -----      |
| PsAe_MUK59325.1                                | -----        | -----       | -----      | -----      |
| Stau_SCT90678.1                                | -----K       | RETTQVPIVN  | G          | -----      |
| Stpn_Bacilli_multispecies_WP_048762376.1       | -----I       | AQTMQIPIIN  | -----      | -----      |
| PsAe_WP_150019979.1                            | -----        | -----       | -----      | -----      |
| PsAe_WP_121410777.1                            | -----        | -----       | -----      | -----      |
| Enfu_VFA68308.1                                | -----        | OK-Q        | AKT        | -----      |
| Stpn_WP_160544498.1                            | -----        | PD-S        | VEV        | -----      |
| Stpn_Streptococcus_multispecies_WP_049527645.1 | -----        | SS-E        | SKQ        | -----      |
| PsAe_RUC36476.1                                | -----        | VPE         | -----      | -----      |
| Enfu_WP_016624302.1                            | -----        | PE          | -----      | -----      |
| Limo_WP_003733096.1                            | -----        | PEGK        | VAA        | -----      |
| Listeria_multispecies_WP_003767439.1           | -----        | PEGK        | VAA        | -----      |
| Stpn_CJR66226.1                                | -----        | -----       | -----      | -----      |
| Stpn_COC44426.1                                | -----        | -----       | -----      | -----      |
| Stpn_CVM85423.1                                | -----        | -----       | -----      | -----      |
| Stpn_CVM86034.1                                | VAGAGLPG-A   | ASAAQLAAAA  | AMDGPRPVTV | GQPVKPGAAA |
| Chtr_CQB85900.1                                | -----T       | ASTQSFGAIT  | G          | -----QF    |
| Chtr_CRH87370.1                                | LN-PVIPA-T   | AATNSYP     | -----      | -----      |
| Chtr_CRH89418.1                                | -----PS-N    | ATT         | -----      | -----      |
| PsAe_WP_121124925.1                            | -----        | -----       | -----      | -----      |
| Errh_WP_016357241.1                            | -----        | NDGH        | VEV        | -----      |
| Errh_WP_173446533.1                            | -----        | -----       | -----      | -----      |
| Chtr_CRH67572.1                                | -----        | -----       | -----      | -----      |
| Chtr_CRH88717.1                                | LA-ALTPH-T   | ADD SQTNNDT | E          | -----      |
| PsAe_SQG56831.1                                | -----PH-S    | EVD         | -----      | -----      |
| Codi_WP_003849886.1                            | -----GVVPA-G | AVA         | -----      | -----      |
| Chtr_CRH62988.1                                | -----IAN-G   | ATO         | -----      | -----      |
| PsAe_SQG59153.1                                | TSVFPATESA   | TETQIFPHEG  | LID        | AAPPAPSIAP |
| Codi_WP_003852190.1                            | -----FPIEDAS | THTRAFQIPIT | PQP        | ATPIGPVAQR |
| Chtr_CRH93390.1                                | -----        | -----       | -----      | -----      |
| Chtr_CPS17231.1                                | -----        | -----       | -----      | -----      |
| Chtr_CQB89058.1                                | -----        | -----       | -----      | -----      |

441

|                                                |             |             |           |              |
|------------------------------------------------|-------------|-------------|-----------|--------------|
| StAu_newman_A6QGC0.1                           | -P-AHHQQFQ  | KPEGTVYEPK  | -----PKKK | -----STRKI   |
| Stau_aureus_CAA73980.1                         | -----       | -----       | -----     | -----        |
| Ecoli_MQS28384                                 | -----       | -----       | -----     | -----        |
| PsAe_MUK59325.1                                | -----       | -----       | -----     | -----        |
| Stau_SCT90678.1                                | -P-AHHOOFQ  | KPEGTVYEPK  | -----PKKK | -----STRKI   |
| Stpn_Bacilli_multispecies_WP_048762376.1       | -----HHKFO  | ASENNVYTPO  | -----RKKR | -----SKKKK   |
| PsAe_WP_150019979.1                            | -----       | -----       | -----     | -----        |
| PsAe_WP_121410777.1                            | -----       | -----       | -----     | -----        |
| Enfu_VFA68308.1                                | -----TEKIT  | PDSASNDKTK  | -----SKK  | -----KASHR   |
| Stpn_WP_160544498.1                            | -----PKEKE  | ASKKEASTPP  | -----SSK  | -----KSKKP   |
| Stpn_Streptococcus_multispecies_WP_049527645.1 | -----AVSKO  | PRKNSTLAKN  | -----KKK  | -----KKKKS   |
| PsAe_RUC36476.1                                | -----DI     | ADDILAEQPP  | -----KKN  | -----RKKL-W  |
| Enfu_WP_016624302.1                            | -----ELEA   | ADETPAEKQP  | -----KKK  | -----KRKT-W  |
| Limo_WP_003733096.1                            | -----AEVV   | PEKKDKKKK   | -----KMS  | -----KKKK-I  |
| Listeria_multispecies_WP_003767439.1           | -----EEVA   | VDDKKGKKKK  | -----KMS  | -----KKKK-V  |
| Stpn_CJR66226.1                                | -----       | AEVTTAQENK  | -----TKKN | -----GKRKK-W |
| Stpn_COC44426.1                                | -----       | GETDDKEQQP  | -----AKK  | -----KKRK-W  |
| Stpn_CVM85423.1                                | -----HPV    | QKPKKKEKQK  | -----PKK  | -----KRKK-W  |
| Stpn_CVM86034.1                                | TP--RPEPQG  | DTPAPATATH  | -----RRV  | -----RRRLRRR |
| Chtr_CQB85900.1                                | EPYTONTGYN  | TRAAQLAANR  | -----AKR  | -----SKRI    |
| Chtr_CRH87370.1                                | -----FTSQT  | TDITPAIEEE  | -----EET  | -----QSKK-W  |
| Chtr_CRH89418.1                                | -----TFA    | PVATQEEEEE  | -----PEK  | -----KSKKG   |
| PsAe_WP_121124925.1                            | -----       | -----       | -----     | -----NOKL    |
| Errh_WP_016357241.1                            | -----       | -----       | -----     | -----KRKM    |
| Errh_WP_173446533.1                            | -----EYS    | DEPIETEE    | -----PKK  | -----KRKFPWF |
| Chtr_CRH67572.1                                | -----RTVVO  | AAGVQAMHS   | -----PKK  | -----NRRS    |
| Chtr_CRH88717.1                                | -----NSIOTG | TYVTTAEOHT  | -----ESRK | GGTRSKK      |
| PsAe_SQG56831.1                                | -----GYEHS  | AFAGPAHAHE  | -----EERS | G-MSKAMK     |
| Codi_WP_003849886.1                            | -----GSAAV  | AGAGGAHAAP  | -----RSS  | -----NRGLR   |
| Chtr_CRH62988.1                                | -----NRKSA  | THRAQLRAQE  | -----DEK  | -----RHKNKVI |
| PsAe_SQG59153.1                                | DPYAAAAPAA  | PETIPPGPVE  | EPPVERPIT | -----NRSKTS  |
| Codi_WP_003852190.1                            | KPDYSPEPVA  | POHAPAAATHE | -----PVT  | -----NRSKIS  |
| Chtr_CRH93390.1                                | -----PAKNN  | AKQAEAEKKT  | -----DKI  | -----KRRMRTR |
| Chtr_CPS17231.1                                | -----       | -----       | -----     | -----        |
| Chtr_CQB89058.1                                | -----       | -----       | -----     | -----        |

StAu\_newman\_A6QGC0.1  
 Stau\_aureus\_CAA73980.1  
 Ecoli\_MQS28384  
 PsAe\_MUK59325.1  
 Stau\_SCT90678.1  
 Stpn\_Bacilli\_multispecies\_WP\_048762376.1  
 PsAe\_WP\_150019979.1  
 PsAe\_WP\_121410777.1  
 Enfu\_VFA68308.1  
 Stpn\_WP\_160544498.1  
 Stpn\_Streptococcus\_multispecies\_WP\_049527645.1  
 PsAe\_RUC36476.1  
 Enfu\_WP\_016624302.1  
 Limo\_WP\_003733096.1  
 Listeria\_multispecies\_WP\_003767439.1  
 Stpn\_CJR66226.1  
 Stpn\_COC44426.1  
 Stpn\_CVM85423.1  
 Stpn\_CVM86034.1  
 Chtr\_CQB85900.1  
 Chtr\_CRH87370.1  
 Chtr\_CRH89418.1  
 PsAe\_WP\_121124925.1  
 Errh\_WP\_016357241.1  
 Errh\_WP\_173446533.1  
 Chtr\_CRH67572.1  
 Chtr\_CRH88717.1  
 PsAe\_SQG56831.1  
 Codi\_WP\_003849886.1  
 Chtr\_CRH62988.1  
 PsAe\_SQG59153.1  
 Codi\_WP\_003852190.1  
 Chtr\_CRH93390.1  
 Chtr\_CPS17231.1  
 Chtr\_CQB89058.1

481

```

--VLLSLIFS LLM--IALV SFVA---M AMF---GN
-----
--VLLSLIFS LLM--IALV SFVA---M AMF---GN
--VAIFILA LLL--LSLI GFIA---W GML---GD
-----
--LLGTIMKL FFA--LCVV GIIVFAY--K ILV---SP
--FWQLFRF FIL--ALVL LLAGFAY--F FMS---SSN
--FFSTSLKV FLG--LVFI GIIIFAY--L VFT---NP
--GLAIAALIA LAI--GGL AFAMS---GG
--LWILIAALVA LVA--GAAV YFAAT---RN
--ALIVSSVIII FII--GILL L-----W LLG---KSP
--ILIVSSVIVL FII--GILL L-----W LLG---KGP
--PWVLLTICLV FIT--AGIL AVTVFPSL---FMP
--PWVLLAVCFI FIM--AAVL AVTVFPSL---FMP
--PWIVASILFV LTA--ATIL AITVFPGL---LFP
--TLAAGAVLI GLA--LVLP WLAAA---LR
--VITSVISA VVCAIVVAGI LLVLNRS---KLA
--LWVTLAVLGV IVA--MAGL FFGLKAA--G LLGTDPSLEI
--IIAALVVV ALL--LMSGI WYALSHAS---SDK
--ILI-----TN
--IVGASLLA LVI--IIFSI WMIFAPK---KP
--TWIIRTIIVIL IVC--LILLL GLVAGHVI--Q VDG---LL
--FIGKFLAI IAF--VAII GGVGGWWWWN EYG---PG
--LITALLLI ITL--IAAL SSGIYWW--F FFG---PG
--AALAVLAV LVL--GVGG AFAYD---F FVSN--SSKNR
--IIAAILAV LVL--AVGA GFAID---H FGGG--PFSQR
--AGVLGGTLVL IAI--IVALV S-----Y FMG---QG
--FIIWLVLV LVV--TASV AIGG---W WFG---SG
--FVLWLIIV ITL--ATAV ALGA---W WFG---SG
--YKVLIGAIFL LAA--AFV T-----I LLS---TP
--ILASVIIV LLA-----LL WMNLFTR---HG
  
```

StAu\_newman\_A6QGC0.1  
 Stau\_aureus\_CAA73980.1  
 Ecoli\_MQS28384  
 PsAe\_MUK59325.1  
 Stau\_SCT90678.1  
 Stpn\_Bacilli\_multispecies\_WP\_048762376.1  
 PsAe\_WP\_150019979.1  
 PsAe\_WP\_121410777.1  
 Enfu\_VFA68308.1  
 Stpn\_WP\_160544498.1  
 Stpn\_Streptococcus\_multispecies\_WP\_049527645.1  
 PsAe\_RUC36476.1  
 Enfu\_WP\_016624302.1  
 Limo\_WP\_003733096.1  
 Listeria\_multispecies\_WP\_003767439.1  
 Stpn\_CJR66226.1  
 Stpn\_COC44426.1  
 Stpn\_CVM85423.1  
 Stpn\_CVM86034.1  
 Chtr\_CQB85900.1  
 Chtr\_CRH87370.1  
 Chtr\_CRH89418.1  
 PsAe\_WP\_121124925.1  
 Errh\_WP\_016357241.1  
 Errh\_WP\_173446533.1  
 Chtr\_CRH67572.1  
 Chtr\_CRH88717.1  
 PsAe\_SQG56831.1  
 Codi\_WP\_003849886.1  
 Chtr\_CRH62988.1  
 PsAe\_SQG59153.1  
 Codi\_WP\_003852190.1  
 Chtr\_CRH93390.1  
 Chtr\_CPS17231.1  
 Chtr\_CQB89058.1

521

```

--KYEETPD-VI GKSVKEAEQI FNKNLKLK GK -ISRSYS DKY
-----
--KYEETPD-VI GKSVKEAEQI FNKNLKLK GK -ISRSYS DKY
--KYAEMPD-LT GKTEKEAEKV LKASHLEIGH -ISREYNDDY
--KKVEVPD-VI GKELGEAYAI LDEAGLNLYS DNS-----
--GSVTLPN-FT GFTYGEVRDW LHKAGLAFKP
--TTIRVPD-VS NKTVAQAKMT LENSGLKVG A -IRNIESDSV
--DSATVPD-VS GQTIQEAQAT LEENSGLTVGA -VSRKESDSV
--DSTOVPN-VV GOELSTAQTK IEGAGFKVGE -VKEVEDDSV
--KDVEVPD-VT NETKADASQA LQSAGLKVDS ETKKIPDDKI
--SDVVVPD-VS GLTESEARTK LEAVNLKVAS ETQEIADDEI
--DEVAVPD-VS GKTEDQAVL LQKEGFVIGK -TAEKNSDEV
--DEVAVPD-VS GKTEDQAIAL LQKDGFIK V -TVEKNDSV
--KDVKIPD-VS GMEYEKAAGL LEKEGLQVDS EVLEISDEKI
--KDVSVPD-VR GMKYEKAEAL LEKNGLRADP DITDIEDEKI
--KDVEVTD-VS GMTVEKAEDT LKKAGFTVAS EPIDIADDEI
--TTVEVPA-VV GLQQDEAVAA LEDAGLVAVV --SSAYMADA
--GEVVVPTFTE TTTQDAAREK LRALGLIPDI --LEDDKSSQ
--TQVDVPD-MK GMDEDAARKA LTEAGLKIKV -GDVANDDEKI
--EMVAVPDNLI GMTQAEAKSA VESVGLVF AI SNETVASDEI
--GTNYMPD-LT GWSKSDVTKF GDLLGLTVEF
--SDIEIPD-LA GLSVSEAKEH LANLGLNYAP SYLYEISDKY
--GYQTIPN-VV NLSTSQAQKK LKAKNFTHIT -IKKVLSDSV
--SYLTMPQ-TA GRSSQAVKSE LAALGLGVIE --EEAFSDTV
--LRVSIPO-VA GMSVAEAEKT LTTVGFQTTT --AHEYSDTV
--SLVNIPK-LE KSSQQDAVNQ LEQLGLQVNV --IEEANPDV
--STVTIPK-LQ NSTQQDAVNQ LEKLGLQVNV --IEEPNPDI
--ATOEVPN-LL NLTOQEALMK IDNSNFFORG TVKEEFSSTV
--RYGEVPQ-VL GMSQIEATAL AQDAGFSTTT --SPVYSDDI
--RYGEVPQ-VL GLDOVQAVAV TEESGFGAVT --EPVYSDDV
--ATVKVPD-VA GLTRDOAVDK IESAGLKIQG -VKEEASSDV
--MVTLKD-LS NYSLKSAQDY AKEHGLTLQI --NQEYSDDV
--SSVEIPD-IY GLPESEAEQL LDKAHLRYEI -IDSVYTTVEV
  
```

561

|                                                |            |             |            |             |
|------------------------------------------------|------------|-------------|------------|-------------|
| StAu_newman_A6QGC0.1                           | PENEIIKTTP | NTGERVERGD  | SVDVVISKGP | E---KVKMPN  |
| Stau_aureus_CAA73980.1                         | -----      | -----       | -----      | -----       |
| Ecoli_MQS28384                                 | -----      | -----       | -----      | -----       |
| PsAe_MUK59325.1                                | PENEIIKTTP | NTGERVERGD  | SVDVVISKGP | E---NVKMPN  |
| Stau_SCT90678.1                                | PENEIIKTTP | NTGERVERGD  | SVDVVISKGP | E---KVKMPN  |
| Stpn_Bacilli_multispecies_WP_048762376.1       | PENKIINSNP | KAGERVNQQE  | KVDVVLSKGP | E---KINMPN  |
| PsAe_WP_150019979.1                            | --GSIVKD-- | -----       | -----      | -----       |
| PsAe_WP_121410777.1                            | -----      | -----       | -----      | -----D      |
| Enfu_VFA68308.1                                | SEGLVVKTD  | AAGRSRREGA  | KVNLYIATPN | K---SFTLGN  |
| Stpn_WP_160544498.1                            | EEGKVIKTD  | KSGTTQKEGS  | EVDLLVSKGS | K---RFVMTD  |
| Stpn_Streptococcus_multispecies_WP_049527645.1 | DTGKVIKTD  | TAGTTRKEGS  | SIDIYVSSGS | K---GFALKD  |
| PsAe_RUC36476.1                                | EEGKVVKTD  | EAKSSVKKGR  | SVTLYISSGT | E---KIEMAD  |
| Enfu_WP_016624302.1                            | EEGNVVKTD  | AATTTTVKENR | EVTLYISSGS | K---AIELKD  |
| Limo_WP_003733096.1                            | DEGKVINTDP | EAGEMKEKGT  | KINLFVSIGS | K---KITMDD  |
| Listeria_multispecies_WP_003767439.1           | EEGKVINTDP | SAGEMKEKGT  | KINLFVSIGS | K---KITMED  |
| Stpn_CJR66226.1                                | EEGLMVKTD  | KADTTVKEGA  | TVTLYKSTGK | A---KTEIGD  |
| Stpn_COC44426.1                                | EEELMVKTD  | KAGSTVKEGS  | SVKLYKSIGK | P---KTQLID  |
| Stpn_CVM85423.1                                | EKGLVVKTD  | KIGTKVKEGT  | EIOLYOSTGK | E---KTELPD  |
| Stpn_CVM86034.1                                | PDGTVTQSD  | PTGTEVPRGA  | KVRIRVSRGE | E---GIALSD  |
| Chtr_CQB85900.1                                | PEGTFKQLP  | KGGAKVSSGS  | RVSVWFVSGP | Q---STKIPD  |
| Chtr_CRH87370.1                                | PEGQFVSSD  | AIGTSVDKGS  | IVTVHFSAGI | A---NVKVPD  |
| Chtr_CRH89418.1                                | EEGKVAKTD  | PSGNQVEVGS  | TVTAKLSSGA | E---SVVIPD  |
| PsAe_WP_121124925.1                            | -----      | -----       | -----      | -----       |
| Errh_WP_016357241.1                            | EDGKLIGTKP | EKGTKVLKGD  | QIKLIVSQGK | ----IYTVED  |
| Errh_WP_173446533.1                            | DKGQVISCNY | DAGQSVYHGN  | TIVLKVSQGP | G---YLVED   |
| Chtr_CRH67572.1                                | QSGIVISSDP | DGGQPVHKNA  | EVVRVTSKGI | D---MRAVPD  |
| Chtr_CRH88717.1                                | DKDTVIASTP | EGGTTAHPSP  | IITLRISDGV | E---YLVNPN  |
| PsAe_SQG56831.1                                | PRGKVIRTNP | TSGSSVQKNT  | TVTIVVSSGK | E---VTEVPD  |
| Codi_WP_003849886.1                            | PRGKVIRTNP | TDGSNVQRNS  | TVRLTISSGK | E---ITEVPD  |
| Chtr_CRH62988.1                                | EKGKVIDQDP | DAGHKVAKGT  | QINIVVSKGA | EPAADVTPD   |
| PsAe_SQG59153.1                                | PADLVAGAI  | EVGHRVAKGN  | EITLLVSQGP | P---TVPS    |
| Codi_WP_003852190.1                            | PKNAIAGTKP | DQGQRAVKGD  | DITLLVSQGR | P---TVPD    |
| Chtr_CRH93390.1                                | EAGKVIRTDP | AAKTSRREGS  | AVDLFIADV  | E---AVTVPD  |
| Chtr_CPS17231.1                                | EKGLVISMED | GPGTKVERGS  | TVTIKISKGP | KEDKETTVTK  |
| Chtr_CQB89058.1                                | PKGAVYDLTP | KAGSKVKAGR  | IIFITLNAYC | P---RNGIIPS |

601

|                                                |             |            |             |            |
|------------------------------------------------|-------------|------------|-------------|------------|
| StAu_newman_A6QGC0.1                           | -VIG--LPKE  | EALQKL-KSL | GLK--DVTIE  | KVYNN----- |
| Stau_aureus_CAA73980.1                         | -----       | --MQKL-KSL | GLK--DVTIE  | KVYNN----- |
| Ecoli_MQS28384                                 | -----       | -----      | -----       | -----      |
| PsAe_MUK59325.1                                | -VIG--LPKE  | QALQKL-KSL | GLK--DVKIE  | KVYNN----- |
| Stau_SCT90678.1                                | -VIG--LPKE  | EALQKL-KSL | GLK--DVTIE  | KVYNN----- |
| Stpn_Bacilli_multispecies_WP_048762376.1       | -VIG--IKKE  | DAIKKL-KDH | KLN--HVTIN  | QEYNS----- |
| PsAe_WP_150019979.1                            | -----       | -----      | -----       | -----      |
| PsAe_WP_121410777.1                            | -----       | -----      | -----       | -----      |
| Enfu_VFA68308.1                                | -YKE--HNYK  | DILKDL-QGK | GVKKSLIKVK  | RKINN----- |
| Stpn_WP_160544498.1                            | -YTG--MSYR  | DAVSDLTENY | GLSKNQIVKK  | EVTNN----- |
| Stpn_Streptococcus_multispecies_WP_049527645.1 | -YKG--KNYK  | DAIEDLTSNY | GVSEDQIDIO  | HVEDD----- |
| PsAe_RUC36476.1                                | -YTN--ESYE  | SAVEAL-KKL | GFSEDQITTK  | KEY-----   |
| Enfu_WP_016624302.1                            | -YTD--MSYE  | EVESEL-LSL | GFSASQIKKT  | TEFNS----- |
| Limo_WP_003733096.1                            | -YTG--RSYT  | DTKALL-EEQ | GFK--NISSE  | EAYSS----- |
| Listeria_multispecies_WP_003767439.1           | -YTG--RSYS  | ETKTLL-EQQ | GFS--NISAE  | EAYSS----- |
| Stpn_CJR66226.1                                | -VTG--QTVQ  | OAKKAL-KDQ | GFN--HVTIN  | EVND-----  |
| Stpn_COC44426.1                                | -VKG--ROIG  | DAKKAL-KEK | GFK--HVNPK  | EEND-----  |
| Stpn_CVM85423.1                                | -VTG--EKVE  | KAKERL-EKK | GFK--QVVVE  | EVNDN----- |
| Stpn_CVM86034.1                                | SLHG--LSED  | AARREL-ERL | GLR--VSSVQ  | YQDDG----- |
| Chtr_CQB85900.1                                | -VTG--KSQD  | VARKAL-ERA | GFK--ISNVR  | VEDST----- |
| Chtr_CRH87370.1                                | -VTGGTSTQE  | EARKQL-EEA | GLR--VGNVE  | TTDEP----- |
| Chtr_CRH89418.1                                | NLVG--MSPD  | AAKQAI-EAL | GLVY--EQTAD | PVASA----- |
| PsAe_WP_121124925.1                            | -----       | -----      | -----       | -----      |
| Errh_WP_016357241.1                            | -FTG--KSVN  | DVKAIL-SDK | NIN--IKTT   | SEYSS----- |
| Errh_WP_173446533.1                            | -FTG--QTLT  | EAETTL-DKE | GVKL--NIEVK | YKNAA----- |
| Chtr_CRH67572.1                                | -LVG--KNKS  | EIETLL-IDA | GLA--VGTIN  | EEYSE----- |
| Chtr_CRH88717.1                                | -VVG--KTAD  | EAQHIL-TQA | RFA--ASAS   | EDWSN----- |
| PsAe_SQG56831.1                                | -LAR--KNTA  | DAAKIL-EEA | GLQL--DSTVR | EESSD----- |
| Codi_WP_003849886.1                            | -LSG--KNTA  | DAVKIL-EAA | GLLL--DPTVR | EDSSD----- |
| Chtr_CRH62988.1                                | -LKG--KSPS  | EAEAIL-SQL | GLK--SQAGD  | SVNSD----- |
| PsAe_SQG59153.1                                | -TPS--SHDTA | EVRALL-EER | SLS--YSEAP  | PEYSD----- |
| Codi_WP_003852190.1                            | -VPO--SRSAS | EYRRLL-EER | TLE--YRESA  | PEFSD----- |
| Chtr_CRH93390.1                                | -VSG--SDLE  | TAKAKL-QEL | GFK--VGEVK  | YKNSE----- |
| Chtr_CPS17231.1                                | TFTV        | -----      | -----       | -----      |
| Chtr_CQB89058.1                                | -LID--VSER  | QARARL-ISL | GFE--NITPS  | YVAGPFDGLV |



StAu\_newman\_A6QGC0.1  
 Stau\_aureus\_CAA73980.1  
 Ecoli\_MQS28384  
 PsAe\_MUK59325.1  
 Stau\_SCT90678.1  
 Stpn\_Bacilli\_multispecies\_WP\_048762376.1  
 PsAe\_WP\_150019979.1  
 PsAe\_WP\_121410777.1  
 Enfu\_VFA68308.1  
 Stpn\_WP\_160544498.1  
 Stpn\_Streptococcus\_multispecies\_WP\_049527645.1  
 PsAe\_RUC36476.1  
 Enfu\_WP\_016624302.1  
 Limo\_WP\_003733096.1  
 Listeria\_multispecies\_WP\_003767439.1  
 Stpn\_CJR66226.1  
 Stpn\_COC44426.1  
 Stpn\_CVM85423.1  
 Stpn\_CVM86034.1  
 Chtr\_CQB85900.1  
 Chtr\_CRH87370.1  
 Chtr\_CRH89418.1  
 PsAe\_WP\_121124925.1  
 Errh\_WP\_016357241.1  
 Errh\_WP\_173446533.1  
 Chtr\_CRH67572.1  
 Chtr\_CRH88717.1  
 PsAe\_SQG56831.1  
 Codi\_WP\_003849886.1  
 Chtr\_CRH62988.1  
 PsAe\_SQG59153.1  
 Codi\_WP\_003852190.1  
 Chtr\_CRH93390.1  
 Chtr\_CPS17231.1  
 Chtr\_CQB89058.1

641

```

---QAPKGYI ANQSVT-ANT EIAIHDSN-- IKLYESLGIK
---QMPKGYI FKQNIN-PNE SVKINDHH-- IVLTESLGVK
-----
---DYTTGTI LAQSLP-EGT SFNPDGNN-K LTLTVAV-ND
---QYEPGEI ISQTP-AGE DFNPSGND-K IIFEVAT-AS
---SAEEGEI LSQSPG-KNK SFNPKDSKAK IKFRVAT-PK
-----
---DVEEGNI ISQDPG-KGS KVEPDSDT-- ISFVVSDBGQ
---EIEKGLI ISQTP-EGT EVVAKSTD-- VKFVVSCKGAE
---EVDKGM IISQTP-EGT EVVAKSTD-- VKFVVSCKGAE
---EKNAGTV IDQNP-AGT ELVPSDQ-- VKLTVSIGPE
---DSEAGTV IDQNP-AGT DMVASDDE-- VNLTVSLGPA
---DTESGIV MEQKPS-ANT ELVAADDE-- VTLTVSIGPA
---RLERGLL ARTDPA-MGT HV-PPGSS-- VVLHLSSGM-
---EVKKNHV TRTDPS-ADS FA-DKGSM-- VTLYISSGLT
---GIAQGMV VSTDPA-PGT VI-PKOTP-- VTLYVASGE-
---DVEEGKV AQVNPS-VGS KV-KKGST-- VKVSLSSGPK
-----
---SVPTGHT IRQEGMLPGD KIKPEORY-D IVLVVSSDKE
---DTNPGVI LSQKLLKAGT RIDPNANE-T IQFVVSQNPT
---EVAKDIV ISQSLD-PDT SI-PHDTK-- IDVVVSKGRE
---DVPKGTV ISQTP-AGE SI-PHDSS-- VTYIVSKGRE
---SVPNGEI IEQTPS-AGS QV-SRGSK-- VVITVSTGVQ
---TVPKGEI IEVSPA-AGS QV-SRGSK-- VSITVSTGVE
---DVEVGKI AAOTPA-AGT TA-KAGDT-- ITYOLSKGPN
---DVPEGKV VSLKPE-PGT TV-RVGSE-- VAVALSARGPA
---SVPEGKI ARVVPG-SGN EV-AVGSA-- VSVALSQGPA
---SVAEGNV ISTAPK-ANT SK-SKGST-- INLVVSSGVE
-----
MGVQLPSPQT LA-----PGT RV-PLSTP-- LILLISVST-

```

StAu\_newman\_A6QGC0.1  
 Stau\_aureus\_CAA73980.1  
 Ecoli\_MQS28384  
 PsAe\_MUK59325.1  
 Stau\_SCT90678.1  
 Stpn\_Bacilli\_multispecies\_WP\_048762376.1  
 PsAe\_WP\_150019979.1  
 PsAe\_WP\_121410777.1  
 Enfu\_VFA68308.1  
 Stpn\_WP\_160544498.1  
 Stpn\_Streptococcus\_multispecies\_WP\_049527645.1  
 PsAe\_RUC36476.1  
 Enfu\_WP\_016624302.1  
 Limo\_WP\_003733096.1  
 Listeria\_multispecies\_WP\_003767439.1  
 Stpn\_CJR66226.1  
 Stpn\_COC44426.1  
 Stpn\_CVM85423.1  
 Stpn\_CVM86034.1  
 Chtr\_CQB85900.1  
 Chtr\_CRH87370.1  
 Chtr\_CRH89418.1  
 PsAe\_WP\_121124925.1  
 Errh\_WP\_016357241.1  
 Errh\_WP\_173446533.1  
 Chtr\_CRH67572.1  
 Chtr\_CRH88717.1  
 PsAe\_SQG56831.1  
 Codi\_WP\_003849886.1  
 Chtr\_CRH62988.1  
 PsAe\_SQG59153.1  
 Codi\_WP\_003852190.1  
 Chtr\_CRH93390.1  
 Chtr\_CPS17231.1  
 Chtr\_CQB89058.1

681

```

QVYVEDFEHK SFSKAKKALE EKG--FKVES KEEY-----
KVYVKDYENK NYQNAKKELE SRG--LKVQV KTTN-----
-----
PMIMPDVITGM TVGEVIETLT DLG--LDADN LVFYQMONGV
TVTIPTLVGY SYADAKNALL DLG--FKASQ IQTD-----
TVTMPDVITGL TVSTAVQTLN RKS--ISSSS IEYHDYNTGA
-----
TVTLRNYTGE DYNVYNELI AQG--FTDSM LSFS-----
PITLKDRLGY TKTAVEDYAS PLG--LKVSS KEEN-----
PITLIDLRGY TKTAVEDYAS PLG--LKVSS KEEN-----
DITLRDLKTY SKEAASGYLE DNG--LKLVE KEAY-----
DVTLRDLKTY SKEAASGYLE DNG--LQOLVE KOAH-----
DITLRDLTTY SKQAASNYLE DNG--LKLDE KEAY-----
VAVPDVVGGM SAPDARRQLA LSAPELRVRI QDED-----
KVP-DGLVGO SKDVVTSELO NLG--FTVNV VEEV-----
VKIDSYIGL SLSEAEKSLN ALK--IQFDT EQVS-----
SVEVPDVITGM TQDQAREALA AKG--LTVGS VQVS-----
-----
LVLPGLDIGK SIADAKAOLE GLG--VEVTT SELPT-QNLS
IVIPESLIGM DVNEAKESLN DQG--IAVVL -----
PLTVPDLMAM SSADAQAAIE ALG--LVASP SEEY-----
PITIPKIGEL SGSDYEKALT DAG--FSVTK QEEF-----
NVRVPVVTGM KWDQAEGLNT SLG--FVPDV RT-----
TVRVPVITGM KWDQAEGLNT SLG--FKPEV VR-----
EADVPNVVGK TEDEAQAAIT AAG--FNVSV QREE-----
PVNVPHVAEM SEESARDQLE KLG--LKVNI TEEF-----
PVTIPNVSER PVDQARNELE KLG--FDVTI AKEF-----
TVTVPDVAGI SOSVAKDALT AAG--LTVGT VTENA-----
-----
NYVGD DLSKSEKPDN DKG-----

```

StAu\_newman\_A6QGC0.1  
 Stau\_aureus\_CAA73980.1  
 Ecoli\_MQS28384  
 PsAe\_MUK59325.1  
 Stau\_SCT90678.1  
 Stpn\_Bacilli\_multispecies\_WP\_048762376.1  
 PsAe\_WP\_150019979.1  
 PsAe\_WP\_121410777.1  
 Enfu\_VFA68308.1  
 Stpn\_WP\_160544498.1  
 Stpn\_Streptococcus\_multispecies\_WP\_049527645.1  
 PsAe\_RUC36476.1  
 Enfu\_WP\_016624302.1  
 Limo\_WP\_003733096.1  
 Listeria\_multispecies\_WP\_003767439.1  
 Stpn\_CJR66226.1  
 Stpn\_COC44426.1  
 Stpn\_CVM85423.1  
 Stpn\_CVM86034.1  
 Chtr\_CQB85900.1  
 Chtr\_CRH87370.1  
 Chtr\_CRH89418.1  
 PsAe\_WP\_121124925.1  
 Errh\_WP\_016357241.1  
 Errh\_WP\_173446533.1  
 Chtr\_CRH67572.1  
 Chtr\_CRH88717.1  
 PsAe\_SQG56831.1  
 Codi\_WP\_003849886.1  
 Chtr\_CRH62988.1  
 PsAe\_SQG59153.1  
 Codi\_WP\_003852190.1  
 Chtr\_CRH93390.1  
 Chtr\_CPS17231.1  
 Chtr\_CQB89058.1

721

```

---SDDID-E GDVISQSPK- GKSVD---EG STISFVV---
---SDTKD-K DIIISQSPK- QTEVN---EG STVELMV---
---                QMPKP GAMVK---VN TTVLLY---
---                T GTAVSQDESG GTTVK---AG TAITVHF---
YQAVVTPPSS SKIASQDPYY GGEVGL-RRG DKVKLYLLGS
---SDQPSS- ATVYAQYPYA GTSVEL-SSG ETVTLYL-
KLDKDKVPSS TEVLYQDPQA GTSVD----- GTVILYV---
---SDSVS-----
YVYDDNVA-S GSIVSQSVAA GVAID---PTR TTVSFEV---
---SSTVE-K GOVISQSPSA GTAMN---SG DTIEIVI---
---SNSVE-K GOVISQSPSA GTAIN---AG DTIEIVI---
---SDDVP-E GOVMKQEPGA GTAVK---PG NEIEVTF---
---SDDVP-E GOVMKQEPGA GTAVK---PG SNVEVTF---
---SDDVP-E GEVMKQEPGA GTAVK---PG DTVKITF---
---GATTD-T GTVVAQDPQA GVRVD---NR SSLTLTA---
---SDTAS-E GTVTKMNPSS GAAVK---PH SSVTVYV---
---SDEP---A GTIVGQNPQA GK-IA---YN SRVKLSI---
---DDPSQKE GLVISTNPAA GTSVN---KD TAVTLTL---
---                E GYVTKQSIAA ETEIT-----
ISELNSLS-Y GTVIRSNPMP GSYYIQ-NSG NSVTLYY---
---SGSGD-T GVVNVSPSV GSTYTQEGSD SVVTLYYQ-
---SDSVA-E GSLISQTTAA GTTLY---KG DKVEYVV---
---SDSVP-E GAVISVDPAE GTOLY---RG DAVTLTI---
---VDAPEPA GTVVGVSDE GTEIP---KG STVTVKV---
---VDSVEPA GTVVAV-PDE GAEVP---KG SSVTVQI---
---SNKP---E GTVTKQSATG KLA---RK STVTITV---
---NSEIR-G GDAIGTLPEA GTTLP---RG TTVTLRI---
---SDTIP-G GDAIGTDPAA GTTLP---RG SSVTLKV---
---SDTVA-A GLVISTDPAA KAQVA---KG STVNLVI---
---SNNSE--- SESVN---GKG DHVQIYI---
---RDSIP-H GTLQPYDSIM GS-----GG SAI---P-
  
```

StAu\_newman\_A6QGC0.1  
 Stau\_aureus\_CAA73980.1  
 Ecoli\_MQS28384  
 PsAe\_MUK59325.1  
 Stau\_SCT90678.1  
 Stpn\_Bacilli\_multispecies\_WP\_048762376.1  
 PsAe\_WP\_150019979.1  
 PsAe\_WP\_121410777.1  
 Enfu\_VFA68308.1  
 Stpn\_WP\_160544498.1  
 Stpn\_Streptococcus\_multispecies\_WP\_049527645.1  
 PsAe\_RUC36476.1  
 Enfu\_WP\_016624302.1  
 Limo\_WP\_003733096.1  
 Listeria\_multispecies\_WP\_003767439.1  
 Stpn\_CJR66226.1  
 Stpn\_COC44426.1  
 Stpn\_CVM85423.1  
 Stpn\_CVM86034.1  
 Chtr\_CQB85900.1  
 Chtr\_CRH87370.1  
 Chtr\_CRH89418.1  
 PsAe\_WP\_121124925.1  
 Errh\_WP\_016357241.1  
 Errh\_WP\_173446533.1  
 Chtr\_CRH67572.1  
 Chtr\_CRH88717.1  
 PsAe\_SQG56831.1  
 Codi\_WP\_003849886.1  
 Chtr\_CRH62988.1  
 PsAe\_SQG59153.1  
 Codi\_WP\_003852190.1  
 Chtr\_CRH93390.1  
 Chtr\_CPS17231.1  
 Chtr\_CQB89058.1

761

```

-----SKGKK SD-----
-----SKGKK SD-----
-----SKGKK SD-----
-----SKGKK SD-----
-----SKGKK A-----
-----SKGKD KK----- KDSKEDSDS-----SD
-----SR-----
KTTNNSSSTP ID-----
-----TTPEP SS-----
-----SVATA SS-----
-----
-----SQGSQ PK-----
-----SAGPK EK-----
-----SAGPK EK-----
-----SLGPE KK-----
-----SLGPE EK-----
-----SLGPK EK-----
-----SSWIA PT----- AEPSEPAPP-----
-----SKGKP KV-----
-----SSGKA PT-----
-----SSGK-----
-----
-----SKGPE TV-----
-----SKGPE LL-----
-----SNGQM-----
-----SNGAM-----
-----AKAPS OV-----
-----STAVE IPDVRGKSKQ EATSELAAAG IRVNSVTRSD
-----STSVE IPDVRGKSRH AAISALADAG ITVESISRSD
-----SKGAA-----
-----SDSTS HS-----
  
```

|                                                |            |            |            |            |
|------------------------------------------------|------------|------------|------------|------------|
| StAu_newman_A6QGC0.1                           | -----      | -----      | -----      | SSDVKT     |
| Stau_aureus_CAA73980.1                         | -----      | -----      | -----      | SSDVKT     |
| Ecoli_MQS28384                                 | -----      | -----      | -----      | SSDVKT     |
| PsAe_MUK59325.1                                | -----      | -----      | -----      | SSDVKT     |
| Stau_SCT90678.1                                | -----      | -----      | -----      | -----      |
| Stpn_Bacilli_multispecies_WP_048762376.1       | DKKDNH     | -----      | -----      | TTSVKN     |
| PsAe_WP_150019979.1                            | -----      | -----      | -----      | -----      |
| PsAe_WP_121410777.1                            | -----      | -----      | -----      | -----      |
| Enfu_VFA68308.1                                | -----      | -----      | -----      | SSAS       |
| Stpn_WP_160544498.1                            | -----      | -----      | -----      | TQPS       |
| Stpn_Streptococcus_multispecies_WP_049527645.1 | -----      | -----      | -----      | SLQS       |
| PsAe_RUC36476.1                                | -----      | -----      | -----      | -----      |
| Enfu_WP_016624302.1                            | -----      | -----      | -----      | KLND       |
| Limo_WP_003733096.1                            | -----      | -----      | -----      | QVKE       |
| Listeria_multispecies_WP_003767439.1           | -----      | -----      | -----      | QVKE       |
| Stpn_CJR66226.1                                | -----      | -----      | -----      | PAKT       |
| Stpn_COC44426.1                                | -----      | -----      | -----      | PAKT       |
| Stpn_CVM85423.1                                | -----      | -----      | -----      | PAKT       |
| Stpn_CVM86034.1                                | -----      | -----      | -----      | SSEAPE     |
| Chtr_CQB85900.1                                | -----      | -----      | -----      | EVPR       |
| Chtr_CRH87370.1                                | -----      | -----      | -----      | PAPE       |
| Chtr_CRH89418.1                                | -----      | -----      | -----      | ITIPS      |
| PsAe_WP_121124925.1                            | -----      | -----      | -----      | -----      |
| Errh_WP_016357241.1                            | -----      | -----      | -----      | -----      |
| Errh_WP_173446533.1                            | -----      | -----      | -----      | -----      |
| Chtr_CRH67572.1                                | -----      | -----      | -----      | EVPS       |
| Chtr_CRH88717.1                                | -----      | -----      | -----      | EVPN       |
| PsAe_SQG56831.1                                | -----      | -----      | -----      | FNVPN      |
| Codi_WP_003849886.1                            | -----      | -----      | -----      | FTVPE      |
| Chtr_CRH62988.1                                | -----      | -----      | -----      | SLST       |
| PsAe_SQG59153.1                                | AESGNSADEI | TSIMPPSGSL | IDPARTSVDL | VLAGEVNVPS |
| Codi_WP_003852190.1                            | NEVGNSADEV | TSITPSSGNL | IDPAHTKVSL | ILAGRVEVPS |
| Chtr_CRH93390.1                                | -----      | -----      | -----      | ITMPD      |
| Chtr_CPS17231.1                                | -----      | -----      | -----      | KD         |
| Chtr_CQB89058.1                                | -----      | -----      | -----      | LEPD       |

|                                                |           |            |            |            |            |
|------------------------------------------------|-----------|------------|------------|------------|------------|
| StAu_newman_A6QGC0.1                           | TTESVDVP  | YTG        | KNDK       | SQKVKVYIKD | KDNDGSTK   |
| Stau_aureus_CAA73980.1                         | TTESVDVP  | YTG        | KNDK       | SQKVKVYIKD | KDNDGSTK   |
| Ecoli_MQS28384                                 | TTESVDVP  | YTG        | KNDK       | SQKVKVYIKD | KDNDGSTK   |
| PsAe_MUK59325.1                                | TTESVDVP  | YTG        | KNDK       | SQKVKVYIKD | KDNDGSTK   |
| Stau_SCT90678.1                                | -----     | TH         | QMSK       | ROLNR      | -----      |
| Stpn_Bacilli_multispecies_WP_048762376.1       | YTETYHIP  | YTG        | NDGE       | SQKVKIYIRD | KNNSGTQVS  |
| PsAe_WP_150019979.1                            | -----     | -----      | -----      | -----      | -----      |
| PsAe_WP_121410777.1                            | -----     | -----      | -----      | -----      | -----      |
| Enfu_VFA68308.1                                | SSTGTTT   | -----      | -----      | -----      | SDSVSSSTD  |
| Stpn_WP_160544498.1                            | SSSEET    | -----      | -----      | -----      | DTDSSNQTS  |
| Stpn_Streptococcus_multispecies_WP_049527645.1 | SSSSTT    | -----      | -----      | -----      | HSSSTSS    |
| PsAe_RUC36476.1                                | -----     | -----      | -----      | -----      | -----      |
| Enfu_WP_016624302.1                            | ISGYTK    | -----      | -----      | -----      | SEAQKYLSE  |
| Limo_WP_003733096.1                            | VTKTFNIP  | YTPSDEENPO | PQKIQIYIQD | -----      | KDHSMTSAY  |
| Listeria_multispecies_WP_003767439.1           | VTKTFNIP  | YTPSDPENPO | PQKVQIYIQD | -----      | KDHSMTSAY  |
| Stpn_CJR66226.1                                | VREKVKIP  | YEP        | ENEGD      | ELQVQIAVDD | ADHSISDTY  |
| Stpn_COC44426.1                                | VKEKISIP  | YEP        | EHEGE      | ELEVQIAIDD | KDHSISDTY  |
| Stpn_CVM85423.1                                | VTEKIAIP  | YEP        | ETEGQ      | EMNVQISIDD | AEHSISDLY  |
| Stpn_CVM86034.1                                | PTPSASASP | SPP        | PTESPE     | P          | SESAEPSPS  |
| Chtr_CQB85900.1                                | LAVGTVTF  | -----      | -----      | -----      | KQAKQVLEA  |
| Chtr_CRH87370.1                                | NPDKEK    | -----      | -----      | -----      | -----      |
| Chtr_CRH89418.1                                | GLVGYDQ   | -----      | -----      | -----      | AYVVQTLQE  |
| PsAe_WP_121124925.1                            | -----     | -----      | -----      | -----      | -----      |
| Errh_WP_016357241.1                            | -----     | -----      | -----      | -----      | YSESSRPKEE |
| Errh_WP_173446533.1                            | -----     | -----      | -----      | -----      | -----      |
| Chtr_CRH67572.1                                | ITGKQE    | -----      | -----      | -----      | AEAKRILEA  |
| Chtr_CRH88717.1                                | VVGKOR    | -----      | -----      | -----      | DEATRILEE  |
| PsAe_SQG56831.1                                | ITRLTV    | -----      | -----      | -----      | ADAVRALNA  |
| Codi_WP_003849886.1                            | ITROTI    | -----      | -----      | -----      | GDAVRILHD  |
| Chtr_CRH62988.1                                | LVSKGM    | -----      | -----      | D          | ATEASOKLSD |
| PsAe_SQG59153.1                                | VVGKKY    | -----      | -----      | -----      | SEAKKILEE  |
| Codi_WP_003852190.1                            | VVGKRY    | -----      | -----      | -----      | AEAKRELEA  |
| Chtr_CRH93390.1                                | FGYMKVSY  | -----      | -----      | -----      | AEARROLOA  |
| Chtr_CPS17231.1                                | -----     | -----      | -----      | -----      | DDHSLNNIY  |
| Chtr_CQB89058.1                                | -----     | -----      | -----      | -----      | DDESWM     |

881

|                                                |            |            |        |            |             |            |
|------------------------------------------------|------------|------------|--------|------------|-------------|------------|
| StAu_newman_A6QGC0.1                           | GSFDITSQDR | I          | ---    | ---        | ---         | DIPLRIEK   |
| Stau_aureus_CAA73980.1                         | GSFDITSQDR | I          | ---    | ---        | ---         | DIPLRIEK   |
| Ecoli_MQS28384                                 | GSFDITSQDR | I          | ---    | ---        | ---         | DIPLRIEK   |
| PsAe_MUK59325.1                                | GSFDITSQDR | I          | ---    | ---        | ---         | DIPLRIEK   |
| Stau_SCT90678.1                                | ---        | ---        | ---    | ---        | ---         | ---        |
| Stpn_Bacilli_multispecies_WP_048762376.1       | QTYNIHKDKI | I          | ---    | ---        | ---         | TIPLKIEQ   |
| PsAe_WP_150019979.1                            | ---        | ---        | ---    | ---        | ---         | AE         |
| PsAe_WP_121410777.1                            | ---        | ---        | ---    | ---        | ---         | ---        |
| Enfu_VFA68308.1                                | ASTSDSSSTS | T          | ---    | ---        | ---         | SSSTLPSD   |
| Stpn_WP_160544498.1                            | SSRSSSSSNH | S          | ---    | ---        | ---         | TEATGDAN   |
| Stpn_Streptococcus_multispecies_WP_049527645.1 | STESTSSSTE | T          | ---    | ---        | ---         | PTEATHAD   |
| PsAe_RUC36476.1                                | ---        | ---        | ---    | ---        | ---         | ---        |
| Enfu_WP_016624302.1                            | IGADYMGHES | Y          | ---    | EFSDS      | VEKDKVIRTN  | PAAGTDISK  |
| Limo_WP_003733096.1                            | REMSITQNTS | V          | ---    | ---        | ---         | EITFQIEE   |
| Listeria_multispecies_WP_003767439.1           | REMNIQNTS  | V          | ---    | ---        | ---         | EVTFQIEE   |
| Stpn_CJR66226.1                                | EEFKIKEPTE | R          | ---    | ---        | ---         | TIELKIEP   |
| Stpn_COC44426.1                                | DSFKIKEPTE | K          | ---    | ---        | ---         | TIELKIDQ   |
| Stpn_CVM85423.1                                | ETFKITAPTE | R          | ---    | ---        | ---         | TIKFKIEP   |
| Stpn_CVM86034.1                                | PSASATPSPE | PT         | TTETPS | PTQSPSPSTA | APSEPTGQPP  | SEKEGAKIDK |
| Chtr_CQB85900.1                                | KGFKVVASDA | S          | ---    | AKDDDIVTGM | SEKEGAKIDK  | EKEKEKEKE  |
| Chtr_CRH87370.1                                | ---        | ---        | ---    | ---        | ---         | ---        |
| Chtr_CRH89418.1                                | LGLRTSVAEQ | Y          | ---    | SNS        | LEAGGVLALN  | PTEGSVVAQ  |
| PsAe_WP_121124925.1                            | ---        | ---        | ---    | ---        | ---         | EK         |
| Errh_WP_016357241.1                            | ADEK       | ---        | ---    | ---        | EE          | KPSEPEEKP  |
| Errh_WP_173446533.1                            | ---        | ---        | ---    | ---        | ---         | ---        |
| Chtr_CRH67572.1                                | AGLNVTVQRV | LGG        | VFGTAR | YTD        | ---         | PDAGTVVKK  |
| Chtr_CRH88717.1                                | AGFNVAVKEL | LGG        | YFGTVR | LQDT       | ---         | AGGTAKAK   |
| PsAe_SQG56831.1                                | AGWTGTASKL | TOGERVPTVS | ---    | LSDQNLIASQ | VPTAGTKPLRK | ---        |
| Codi_WP_003849886.1                            | AGWKGNASRL | IOAAKVPTVA | ---    | VTQNLIASQ  | LPTPGTALRK  | ---        |
| Chtr_CRH62988.1                                | AGFGVRVKRO | P          | DAL    | VKKDTVI    | ---         | SFPDKAKK   |
| PsAe_SQG59153.1                                | AGFTVKGTGA | K          | KPSSR  | VYWQ       | ---         | SPTGGRET   |
| Codi_WP_003852190.1                            | AGFSVTTSGT | S          | KSSAR  | VYWQ       | ---         | TPAGGRAEP  |
| Chtr_CRH93390.1                                | LGVSVSAIEK | O          | TDSTVT | ASTSDMVISQ | YPSAGSVIDG  | ---        |
| Chtr_CPS17231.1                                | RDLYIKHDMS | F          | ---    | ---        | ---         | SIPFNIRE   |
| Chtr_CQB89058.1                                | ---        | ---        | ---    | ---        | ---         | ---        |

921

|                                                |            |            |            |            |            |         |
|------------------------------------------------|------------|------------|------------|------------|------------|---------|
| StAu_newman_A6QGC0.1                           | GKTASYIVKV | DGKT       | ---        | ---        | VAEKE      | VSYYDD  |
| Stau_aureus_CAA73980.1                         | GKTASYIVKV | DGKT       | ---        | ---        | VAEKE      | VSYYDD  |
| Ecoli_MQS28384                                 | GKTASYIVKV | DGKT       | ---        | ---        | VAEKE      | VSYYDD  |
| PsAe_MUK59325.1                                | GKTASYIVK  | ---        | ---        | ---        | ---        | ---     |
| Stau_SCT90678.1                                | ---        | ---        | ---        | ---        | ---        | ---     |
| Stpn_Bacilli_multispecies_WP_048762376.1       | GDSAGYTIEV | DDNV       | ---        | ---        | IADKD      | IDYE    |
| PsAe_WP_150019979.1                            | GQSS       | ---        | ---        | ---        | ---        | ---     |
| PsAe_WP_121410777.1                            | ---        | ---        | ---        | ---        | ---        | ---     |
| Enfu_VFA68308.1                                | STTNT      | ---        | ---        | ---        | GT         | ANNPLTQ |
| Stpn_WP_160544498.1                            | SQ         | ---        | ---        | ---        | ---        | PETTD   |
| Stpn_Streptococcus_multispecies_WP_049527645.1 | QQ         | ---        | ---        | ---        | ---        | ---     |
| PsAe_RUC36476.1                                | ---        | ---        | ---        | ---        | ---        | ---     |
| Enfu_WP_016624302.1                            | GDVVSVVYSK | GVDPAKE    | S          | SSEEDSSSSS | SEEKSSDTT  | ---     |
| Limo_WP_003733096.1                            | GSSAGYKIIS | DDKV       | ---        | IDEGT      | VPYPN      | ---     |
| Listeria_multispecies_WP_003767439.1           | GSSAGYKIIS | DDKV       | ---        | IDEGT      | VPYPN      | ---     |
| Stpn_CJR66226.1                                | GQKGYQVMV  | NNKV       | ---        | VSYSK      | IEYPKDE    | ---     |
| Stpn_COC44426.1                                | GQKGYQVMV  | DDKV       | ---        | VSYSK      | IEYPKDN    | ---     |
| Stpn_CVM85423.1                                | GQKGYQVTV  | DDKV       | ---        | VSSKT      | IEYDPDE    | ---     |
| Stpn_CVM86034.1                                | STSPTATPVD | PLPTLTP    | ---        | DPEPS      | IDPPST     | ---     |
| Chtr_CQB85900.1                                | GSTITLTVKS | ATPPSDLTKP | GTGLDLNKPS | TEDPSTSTTT | ---        | ---     |
| Chtr_CRH87370.1                                | GSGTT      | ---        | ---        | PP         | GETPSHN    | ---     |
| Chtr_CRH89418.1                                | GSTVNLTVSK | G          | ---        | PQPA       | PPNPNSG    | Q       |
| PsAe_WP_121124925.1                            | KLTVTLEGTE | ---        | ---        | ---        | ---        | ---     |
| Errh_WP_016357241.1                            | GSN        | ---        | ---        | ---        | ---        | ---     |
| Errh_WP_173446533.1                            | ---        | ---        | ---        | ---        | ---        | ---     |
| Chtr_CRH67572.1                                | GSTVTLFIV  | ---        | ---        | ---        | ---        | ---     |
| Chtr_CRH88717.1                                | GSTITLTIV  | ---        | ---        | ---        | ---        | ---     |
| PsAe_SQG56831.1                                | DAPIEIHLYE | ---        | ---        | FSLSA      | LTNPR      | ---     |
| Codi_WP_003849886.1                            | DAPIEIRLYE | ---        | ---        | FNLAA      | LVPQAQ     | ---     |
| Chtr_CRH62988.1                                | GQVTLVSD   | GLPLINDSH  | ---        | ---        | ---        | ---     |
| PsAe_SQG59153.1                                | GAEIKLRTIG | S          | ---        | ---        | ---        | ---     |
| Codi_WP_003852190.1                            | GATIKLKTLS | S          | ---        | ---        | ---        | ---     |
| Chtr_CRH93390.1                                | TVTLVSVAS  | ---        | ---        | TSGTT      | STTGSSSTTK | ---     |
| Chtr_CPS17231.1                                | GSGQLKVVRN | GDTV       | ---        | LNEKV      | TK         | ---     |
| Chtr_CQB89058.1                                | ---        | ---        | ---        | ---        | ---        | ---     |

|                                                |        |       |        |
|------------------------------------------------|--------|-------|--------|
| StAu_newman_A6QGC0.1                           | -----  | ----- | V      |
| Stau_aureus_CAA73980.1                         | -----  | ----- | V      |
| Ecoli_MQS28384                                 | -----  | ----- | I      |
| PsAe_MUK59325.1                                | -----  | ----- |        |
| Stau_SCT90678.1                                | -----  | ----- |        |
| Stpn_Bacilli_multispecies_WP_048762376.1       | -----  | ----- |        |
| PsAe_WP_150019979.1                            | -----  | ----- |        |
| PsAe_WP_121410777.1                            | -----  | ----- |        |
| Enfu_VFA68308.1                                | -----  | ----- |        |
| Stpn_WP_160544498.1                            | -----  | ----- |        |
| Stpn_Streptococcus_multispecies_WP_049527645.1 | -----  | ----- |        |
| PsAe_RUC36476.1                                | -----  | ----- |        |
| Enfu_WP_016624302.1                            | TSDKAE | STTA  | ESENKD |
| Limo_WP_003733096.1                            | -----  | ----- |        |
| Listeria_multispecies_WP_003767439.1           | -----  | ----- |        |
| Stpn_CJR66226.1                                | -----  | ----- |        |
| Stpn_COC44426.1                                | -----  | ----- |        |
| Stpn_CVM85423.1                                | -----  | ----- |        |
| Stpn_CVM86034.1                                | -----  | ----- |        |
| Chtr_CQB85900.1                                | TNTGL  | ----- |        |
| Chtr_CRH87370.1                                | -----  | ----- |        |
| Chtr_CRH89418.1                                | ANSGS  | ----- |        |
| PsAe_WP_121124925.1                            | -----  | ----- |        |
| Errh_WP_016357241.1                            | -----  | DR    | EA     |
| Errh_WP_173446533.1                            | -----  | ----- |        |
| Chtr_CRH67572.1                                | -----  | ----- |        |
| Chtr_CRH88717.1                                | -----  | ----- |        |
| PsAe_SQG56831.1                                | -----  | ----- |        |
| Codi_WP_003849886.1                            | -----  | ----- |        |
| Chtr_CRH62988.1                                | -----  | ----- |        |
| PsAe_SQG59153.1                                | -----  | ----- |        |
| Codi_WP_003852190.1                            | -----  | ----- |        |
| Chtr_CRH93390.1                                | TTTGS  | TTS   | E      |
| Chtr_CPS17231.1                                | -----  | ----- |        |
| Chtr_CQB89058.1                                | -----  | ----- |        |
